# Supplementary material for: The transcription factor MebHLH18 in cassava functions in decreasing low temperature-induced leaf abscission to promote low-temperature tolerance
Source: Front Plant Sci. 2023 Feb 13;13:1101821. doi: 10.3389/fpls.2022.1101821 (PMC9968922; doi:10.3389/fpls.2022.1101821)
Supplement: Supplementary file 2 [file Table_1.xlsx]

## Sheet: Sheet1
Supplementary Table S5 | The information of sequencing data and the quantitative trait loci on six chromosomes (chromosomes 3, 5, 8, 11, 13, and 16) exceed the significance threshold
sigIndex(Signal	chr	start	end	length_Signal	num_snp	peakPOS	ref	alt	maf	peak_value	peak_Effect	transcript_ID	Annotation	gene_start	gene_end	gene_length	distance	sig_snp_num	pos;distance;ref;alt;maf;p_value;snp_effective
1	Chromosome03	4394111	4494111	100001	1	4444111	C	T	0.123611	6.06388	intronic(Manes.03G048500.v7.0)	Manes.03G047900.v7.0	GO:NA||Interpro:NA||KEGG:NA||Swissprot:NA||NR:hypothetical protein MANES_03G047900 [Manihot esculenta]||pfam:NA	4401945	4402457	513	41654	1	4444111;41654;C;T;0.123611111111111;6.06388484524198;intronic,Manes.03G048500.v7.0
1	Chromosome03	4394111	4494111	100001	1	4444111	C	T	0.123611	6.06388	intronic(Manes.03G048500.v7.0)	Manes.03G048000.v7.0	GO:NA||Interpro:NA||KEGG:K22733 magnesium transporter | (RefSeq) probable magnesium transporter NIPA9 (A)||Swissprot:NA||NR:hypothetical protein MANES_03G048000 [Manihot esculenta]||pfam:NA	4412698	4416831	4134	27280	1	4444111;27280;C;T;0.123611111111111;6.06388484524198;intronic,Manes.03G048500.v7.0
1	Chromosome03	4394111	4494111	100001	1	4444111	C	T	0.123611	6.06388	intronic(Manes.03G048500.v7.0)	Manes.03G048100.v7.0	no	4417647	4417751	105	26360	1	4444111;26360;C;T;0.123611111111111;6.06388484524198;intronic,Manes.03G048500.v7.0
1	Chromosome03	4394111	4494111	100001	1	4444111	C	T	0.123611	6.06388	intronic(Manes.03G048500.v7.0)	Manes.03G048200.v7.0	GO:NA||Interpro:IPR004864; Late embryogenesis abundant protein, LEA-14||KEGG:K04077 chaperonin GroEL | (RefSeq) LOW QUALITY PROTEIN: chaperonin CPN60-like 2, mitochondrial (A)||Swissprot:NDR1/HIN1-like protein 13 OS=Arabidopsis thaliana OX=3702 GN=NHL13 PE=2 SV=1||NR:NDR1/HIN1-like protein 2 [Manihot esculenta]||pfam:Late embryogenesis abundant protein	4423541	4424543	1003	19568	1	4444111;19568;C;T;0.123611111111111;6.06388484524198;intronic,Manes.03G048500.v7.0
1	Chromosome03	4394111	4494111	100001	1	4444111	C	T	0.123611	6.06388	intronic(Manes.03G048500.v7.0)	Manes.03G048300.v7.0	GO:GO:0004672; protein kinase activity; Molecular Function::GO:0004713; protein tyrosine kinase activity; Molecular Function::GO:0005515; protein binding; Molecular Function::GO:0005524; ATP binding; Molecular Function::GO:0006468; protein phosphorylation; Biological Process||Interpro:IPR000719; Protein kinase domain::IPR001245; Serine-threonine/tyrosine-protein kinase catalytic domain::IPR001611…	4431044	4433996	2953	10115	1	4444111;10115;C;T;0.123611111111111;6.06388484524198;intronic,Manes.03G048500.v7.0
1	Chromosome03	4394111	4494111	100001	1	4444111	C	T	0.123611	6.06388	intronic(Manes.03G048500.v7.0)	Manes.03G048400.v7.0	GO:NA||Interpro:IPR004883; Lateral organ boundaries, LOB||KEGG:K13944 LOB domain-containing protein 16 | (RefSeq) LOB domain-containing protein 16 (A)||Swissprot:LOB domain-containing protein 22 OS=Arabidopsis thaliana OX=3702 GN=LBD22 PE=2 SV=1||NR:hypothetical protein MANES_03G048400 [Manihot esculenta]||pfam:Protein of unknown function DUF260	4436471	4437341	871	6770	1	4444111;6770;C;T;0.123611111111111;6.06388484524198;intronic,Manes.03G048500.v7.0
1	Chromosome03	4394111	4494111	100001	1	4444111	C	T	0.123611	6.06388	intronic(Manes.03G048500.v7.0)	Manes.03G048500.v7.0	GO:NA||Interpro:NA||KEGG:NA||Swissprot:NA||NR:uncharacterized protein LOC110611982 [Manihot esculenta]||pfam:NA	4442074	4449891	7818	0	1	4444111;0;C;T;0.123611111111111;6.06388484524198;intronic,Manes.03G048500.v7.0
1	Chromosome03	4394111	4494111	100001	1	4444111	C	T	0.123611	6.06388	intronic(Manes.03G048500.v7.0)	Manes.03G048600.v7.0	GO:GO:0006629; lipid metabolic process; Biological Process::GO:0020037; heme binding; Molecular Function||Interpro:IPR001199; Cytochrome b5-like heme/steroid binding domain::IPR005804; Fatty acid desaturase, type 1||KEGG:K21737 acyl-lipid Delta6-acetylenase / acyl-lipid (9-3)-desaturase [EC:1.14.19.38 1.14.19.47] | (RefSeq) acyl-lipid (9-3)-desaturase-like (A)||Swissprot:Acyl-lipid (9-3)-desatura…	4456267	4458341	2075	-12156	1	4444111;-12156;C;T;0.123611111111111;6.06388484524198;intronic,Manes.03G048500.v7.0
1	Chromosome03	4394111	4494111	100001	1	4444111	C	T	0.123611	6.06388	intronic(Manes.03G048500.v7.0)	Manes.03G048700.v7.0	GO:GO:0003824; catalytic activity; Molecular Function::GO:0044237; cellular metabolic process; Biological Process::GO:0050662; coenzyme binding; Molecular Function||Interpro:IPR001509; NAD-dependent epimerase/dehydratase||KEGG:K06118 UDP-sulfoquinovose synthase [EC:3.13.1.1] | (RefSeq) UDP-sulfoquinovose synthase, chloroplastic isoform X1 (A)||Swissprot:UDP-sulfoquinovose synthase, chloroplastic …	4464541	4466229	1689	-20430	1	4444111;-20430;C;T;0.123611111111111;6.06388484524198;intronic,Manes.03G048500.v7.0
1	Chromosome03	4394111	4494111	100001	1	4444111	C	T	0.123611	6.06388	intronic(Manes.03G048500.v7.0)	Manes.03G048800.v7.0	GO:NA||Interpro:NA||KEGG:NA||Swissprot:NA||NR:hypothetical protein MANES_03G048800 [Manihot esculenta]||pfam:Reverse transcriptase-like	4466537	4466908	372	-22426	1	4444111;-22426;C;T;0.123611111111111;6.06388484524198;intronic,Manes.03G048500.v7.0
1	Chromosome03	4394111	4494111	100001	1	4444111	C	T	0.123611	6.06388	intronic(Manes.03G048500.v7.0)	Manes.03G048900.v7.0	GO:NA||Interpro:NA||KEGG:K06889 uncharacterized protein | (RefSeq) uncharacterized protein LOC110631773 (A)||Swissprot:Putative uncharacterized protein YDL057W OS=Saccharomyces cerevisiae (strain ATCC 204508 / S288c) OX=559292 GN=YDL057W PE=4 SV=1||NR:uncharacterized protein LOC110610547 isoform X1 [Manihot esculenta]||pfam:Alpha/beta hydrolase family	4491232	4494105	2874	-47121	1	4444111;-47121;C;T;0.123611111111111;6.06388484524198;intronic,Manes.03G048500.v7.0
2	Chromosome03	17501888	17601888	100001	1	17551888	C	T	0.124629	6.33264	intergenic(Manes.03G090400.v7.0(dist=7304),Manes.03G088800.v7.0(dist=8470))	Manes.03G088700.v7.0	GO:NA||Interpro:NA||KEGG:NA||Swissprot:NA||NR:hypothetical protein MANES_03G088600 [Manihot esculenta]||pfam:NA	17543749	17543970	222	7918	1	17551888;7918;C;T;0.124629080118694;6.33264082748408;intergenic,Manes.03G090400.v7.0(dist=7304),Manes.03G088800.v7.0(dist=8470)
2	Chromosome03	17501888	17601888	100001	1	17551888	C	T	0.124629	6.33264	intergenic(Manes.03G090400.v7.0(dist=7304),Manes.03G088800.v7.0(dist=8470))	Manes.03G088800.v7.0	GO:NA||Interpro:IPR004265; Plant disease resistance response protein||KEGG:K01870 isoleucyl-tRNA synthetase [EC:6.1.1.5] | (RefSeq) hypothetical protein (A)||Swissprot:Dirigent protein 20 OS=Arabidopsis thaliana OX=3702 GN=DIR20 PE=2 SV=1||NR:dirigent protein 22-like [Manihot esculenta]||pfam:Dirigent-like protein	17560358	17561158	801	-8470	1	17551888;-8470;C;T;0.124629080118694;6.33264082748408;intergenic,Manes.03G090400.v7.0(dist=7304),Manes.03G088800.v7.0(dist=8470)
2	Chromosome03	17501888	17601888	100001	1	17551888	C	T	0.124629	6.33264	intergenic(Manes.03G090400.v7.0(dist=7304),Manes.03G088800.v7.0(dist=8470))	Manes.03G090400.v7.0	no	17544441	17544584	144	7304	1	17551888;7304;C;T;0.124629080118694;6.33264082748408;intergenic,Manes.03G090400.v7.0(dist=7304),Manes.03G088800.v7.0(dist=8470)
3	Chromosome03	33150975	33250975	100001	1	33200975	C	T	0.0732759	7.07126	intergenic(Manes.03G195000.v7.0(dist=28510),Manes.03G195100.v7.0(dist=9109))	Manes.03G195000.v7.0	GO:NA||Interpro:NA||KEGG:NA||Swissprot:NA||NR:hypothetical protein MANES_03G195000, partial [Manihot esculenta]||pfam:NA	33172154	33172465	312	28510	1	33200975;28510;C;T;0.0732758620689655;7.07126222425968;intergenic,Manes.03G195000.v7.0(dist=28510),Manes.03G195100.v7.0(dist=9109)
3	Chromosome03	33150975	33250975	100001	1	33200975	C	T	0.0732759	7.07126	intergenic(Manes.03G195000.v7.0(dist=28510),Manes.03G195100.v7.0(dist=9109))	Manes.03G195100.v7.0	GO:GO:0016021; integral to membrane; Cellular Component||Interpro:IPR004307; TspO/MBR-related protein||KEGG:K05770 translocator protein | (RefSeq) translocator protein homolog (A)||Swissprot:Translocator protein homolog OS=Arabidopsis thaliana OX=3702 GN=TSPO PE=1 SV=1||NR:hypothetical protein MANES_03G195100 [Manihot esculenta]||pfam:TspO/MBR family	33210084	33210620	537	-9109	1	33200975;-9109;C;T;0.0732758620689655;7.07126222425968;intergenic,Manes.03G195000.v7.0(dist=28510),Manes.03G195100.v7.0(dist=9109)
3	Chromosome03	33150975	33250975	100001	1	33200975	C	T	0.0732759	7.07126	intergenic(Manes.03G195000.v7.0(dist=28510),Manes.03G195100.v7.0(dist=9109))	Manes.03G195200.v7.0	GO:GO:0016021; integral to membrane; Cellular Component::GO:0016758; transferase activity, transferring hexosyl groups; Molecular Function||Interpro:IPR008630; Galactosyl transferase||KEGG:K08238 xyloglucan 6-xylosyltransferase [EC:2.4.2.39] | (RefSeq) xyloglucan 6-xylosyltransferase 2-like (A)||Swissprot:Xyloglucan 6-xylosyltransferase 2 OS=Arabidopsis thaliana OX=3702 GN=XXT2 PE=1 SV=1||NR:xylo…	33214519	33216496	1978	-13544	1	33200975;-13544;C;T;0.0732758620689655;7.07126222425968;intergenic,Manes.03G195000.v7.0(dist=28510),Manes.03G195100.v7.0(dist=9109)
3	Chromosome03	33150975	33250975	100001	1	33200975	C	T	0.0732759	7.07126	intergenic(Manes.03G195000.v7.0(dist=28510),Manes.03G195100.v7.0(dist=9109))	Manes.03G195300.v7.0	GO:GO:0006479; protein methylation; Biological Process::GO:0008168; methyltransferase activity; Molecular Function||Interpro:IPR025797; Protein arginine N-methyltransferase CARM1::IPR025799; Protein arginine N-methyltransferase||KEGG:K05931 type I protein arginine methyltransferase [EC:2.1.1.319] | (RefSeq) probable histone-arginine methyltransferase 1.4 isoform X1 (A)||Swissprot:Probable histone…	33218628	33225361	6734	-17653	1	33200975;-17653;C;T;0.0732758620689655;7.07126222425968;intergenic,Manes.03G195000.v7.0(dist=28510),Manes.03G195100.v7.0(dist=9109)
3	Chromosome03	33150975	33250975	100001	1	33200975	C	T	0.0732759	7.07126	intergenic(Manes.03G195000.v7.0(dist=28510),Manes.03G195100.v7.0(dist=9109))	Manes.03G195400.v7.0	GO:GO:0000166; nucleotide binding; Molecular Function::GO:0003824; catalytic activity; Molecular Function::GO:0004812; aminoacyl-tRNA ligase activity; Molecular Function::GO:0004822; isoleucine-tRNA ligase activity; Molecular Function::GO:0005524; ATP binding; Molecular Function::GO:0005737; cytoplasm; Cellular Component::GO:0006418; tRNA aminoacylation for protein translation; Biological Process…	33226276	33238235	11960	-25301	1	33200975;-25301;C;T;0.0732758620689655;7.07126222425968;intergenic,Manes.03G195000.v7.0(dist=28510),Manes.03G195100.v7.0(dist=9109)
3	Chromosome03	33150975	33250975	100001	1	33200975	C	T	0.0732759	7.07126	intergenic(Manes.03G195000.v7.0(dist=28510),Manes.03G195100.v7.0(dist=9109))	Manes.03G195500.v7.0	GO:GO:0005525; GTP binding; Molecular Function||Interpro:IPR006703; AIG1::IPR024283; Domain of unknown function DUF3406, chloroplast translocase||KEGG:K03977 GTPase | (GenBank) ribosome biogenesis GTPase Der (A)||Swissprot:Translocase of chloroplast 159, chloroplastic OS=Arabidopsis thaliana OX=3702 GN=TOC159 PE=1 SV=1||NR:translocase of chloroplast 159, chloroplastic isoform X1 [Manihot esculent…	33241480	33248105	6626	-40505	1	33200975;-40505;C;T;0.0732758620689655;7.07126222425968;intergenic,Manes.03G195000.v7.0(dist=28510),Manes.03G195100.v7.0(dist=9109)
3	Chromosome03	33150975	33250975	100001	1	33200975	C	T	0.0732759	7.07126	intergenic(Manes.03G195000.v7.0(dist=28510),Manes.03G195100.v7.0(dist=9109))	Manes.03G195600.v7.0	GO:NA||Interpro:NA||KEGG:NA||Swissprot:NA||NR:uncharacterized protein LOC110612088 [Manihot esculenta]||pfam:NA	33248777	33251806	3030	-47802	1	33200975;-47802;C;T;0.0732758620689655;7.07126222425968;intergenic,Manes.03G195000.v7.0(dist=28510),Manes.03G195100.v7.0(dist=9109)
4	Chromosome05	17897124	17997124	100001	1	17947124	A	T	0.0702247	7.10302	exon,synonymous(Manes.05G122500.v7.0:Manes.05G122500.1.v7.0:exon4:c.T1113A:p.A371A,)	Manes.05G122400.v7.0	GO:GO:0006952; defense response; Biological Process||Interpro:IPR003614; Knottin, scorpion toxin-like::IPR008176; Gamma thionin::IPR008177; Gamma Purothionin||KEGG:NA||Swissprot:Defensin-like protein 6 OS=Arabidopsis thaliana OX=3702 GN=PDF2.5 PE=3 SV=1||NR:defensin-like protein 1 [Manihot esculenta]||pfam:Gamma-thionin family	17919701	17920369	669	26755	1	17947124;26755;A;T;0.0702247191011236;7.10302170128969;exon,synonymous(Manes.05G122500.v7.0:Manes.05G122500.1.v7.0:exon4:c.T1113A:p.A371A,)
4	Chromosome05	17897124	17997124	100001	1	17947124	A	T	0.0702247	7.10302	exon,synonymous(Manes.05G122500.v7.0:Manes.05G122500.1.v7.0:exon4:c.T1113A:p.A371A,)	Manes.05G122500.v7.0	GO:GO:0004650; polygalacturonase activity; Molecular Function::GO:0005975; carbohydrate metabolic process; Biological Process||Interpro:IPR000743; Glycoside hydrolase, family 28::IPR006626; Parallel beta-helix repeat||KEGG:K01184 polygalacturonase [EC:3.2.1.15] | (RefSeq) polygalacturonase-like (A)||Swissprot:Polygalacturonase OS=Prunus persica OX=3760 PE=2 SV=1||NR:polygalacturonase-like [Maniho…	17947058	17948637	1580	0	1	17947124;0;A;T;0.0702247191011236;7.10302170128969;exon,synonymous(Manes.05G122500.v7.0:Manes.05G122500.1.v7.0:exon4:c.T1113A:p.A371A,)
4	Chromosome05	17897124	17997124	100001	1	17947124	A	T	0.0702247	7.10302	exon,synonymous(Manes.05G122500.v7.0:Manes.05G122500.1.v7.0:exon4:c.T1113A:p.A371A,)	Manes.05G122600.v7.0	GO:GO:0004650; polygalacturonase activity; Molecular Function::GO:0005975; carbohydrate metabolic process; Biological Process||Interpro:IPR000743; Glycoside hydrolase, family 28::IPR006626; Parallel beta-helix repeat||KEGG:K01184 polygalacturonase [EC:3.2.1.15] | (RefSeq) polygalacturonase-like (A)||Swissprot:Polygalacturonase OS=Prunus persica OX=3760 PE=2 SV=1||NR:polygalacturonase-like [Maniho…	17961039	17962889	1851	-13915	1	17947124;-13915;A;T;0.0702247191011236;7.10302170128969;exon,synonymous(Manes.05G122500.v7.0:Manes.05G122500.1.v7.0:exon4:c.T1113A:p.A371A,)
4	Chromosome05	17897124	17997124	100001	1	17947124	A	T	0.0702247	7.10302	exon,synonymous(Manes.05G122500.v7.0:Manes.05G122500.1.v7.0:exon4:c.T1113A:p.A371A,)	Manes.05G122700.v7.0	GO:GO:0004650; polygalacturonase activity; Molecular Function::GO:0005975; carbohydrate metabolic process; Biological Process||Interpro:IPR000743; Glycoside hydrolase, family 28::IPR006626; Parallel beta-helix repeat||KEGG:K01184 polygalacturonase [EC:3.2.1.15] | (RefSeq) polygalacturonase-like (A)||Swissprot:Polygalacturonase OS=Prunus persica OX=3760 PE=2 SV=1||NR:hypothetical protein MANES_05G…	17994975	17996547	1573	-47851	1	17947124;-47851;A;T;0.0702247191011236;7.10302170128969;exon,synonymous(Manes.05G122500.v7.0:Manes.05G122500.1.v7.0:exon4:c.T1113A:p.A371A,)
5	Chromosome08	30499683	30599747	100065	2	30549747	G	A	0.0771429	7.28696	intergenic(Manes.08G094300.v7.0(dist=29244),Manes.08G094400.v7.0(dist=19178))	Manes.08G094300.v7.0	GO:NA||Interpro:IPR001623; DnaJ domain||KEGG:K09536 DnaJ homolog subfamily C member 16 | (RefSeq) heat shock protein DnaJ (A)||Swissprot:DnaJ protein ERDJ3A OS=Arabidopsis thaliana OX=3702 GN=ERDJ3A PE=1 SV=1||NR:dnaJ protein ERDJ3A [Manihot esculenta]||pfam:DnaJ domain	30514953	30520503	5551	29244	2	30549683;29180;C;T;0.0632022471910112;6.64491242819211;intergenic,Manes.08G094300.v7.0(dist=29180),Manes.08G094400.v7.0(dist=19242)	30549747;29244;G;A;0.0771428571428571;7.28696095456362;intergenic,Manes.08G094300.v7.0(dist=29244),Manes.08G094400.v7.0(dist=19178)
5	Chromosome08	30499683	30599747	100065	2	30549747	G	A	0.0771429	7.28696	intergenic(Manes.08G094300.v7.0(dist=29244),Manes.08G094400.v7.0(dist=19178))	Manes.08G094400.v7.0	GO:GO:0000287; magnesium ion binding; Molecular Function::GO:0003824; catalytic activity; Molecular Function::GO:0030976; thiamine pyrophosphate binding; Molecular Function||Interpro:IPR011766; Thiamine pyrophosphate enzyme, C-terminal TPP-binding::IPR012000; Thiamine pyrophosphate enzyme, central domain::IPR012001; Thiamine pyrophosphate enzyme, N-terminal TPP-binding domain::IPR012110; Thiamine…	30568925	30571715	2791	-19178	2	30549683;-19242;C;T;0.0632022471910112;6.64491242819211;intergenic,Manes.08G094300.v7.0(dist=29180),Manes.08G094400.v7.0(dist=19242)	30549747;-19178;G;A;0.0771428571428571;7.28696095456362;intergenic,Manes.08G094300.v7.0(dist=29244),Manes.08G094400.v7.0(dist=19178)
6	Chromosome09	9664060	9764060	100001	1	9714060	C	T	0.498641	6.04246	exon,nonsynonymous(Manes.S065200.v7.0:Manes.S065200.1.v7.0:exon1:c.G367A:p.A123T,)	Manes.09G059000.v7.0	GO:GO:0005515; protein binding; Molecular Function||Interpro:IPR000048; IQ motif, EF-hand binding site||KEGG:K04733 interleukin-1 receptor-associated kinase 4 [EC:2.7.11.1] | (RefSeq) uncharacterized protein LOC110908553 (A)||Swissprot:IQ domain-containing protein IQM3 OS=Arabidopsis thaliana OX=3702 GN=IQM3 PE=2 SV=1||NR:IQ domain-containing protein IQM3-like isoform X1 [Manihot esculenta]||pfam…	9670051	9673664	3614	40396	1	9714060;40396;C;T;0.498641304347826;6.04245573091179;exon,nonsynonymous(Manes.S065200.v7.0:Manes.S065200.1.v7.0:exon1:c.G367A:p.A123T,)
6	Chromosome09	9664060	9764060	100001	1	9714060	C	T	0.498641	6.04246	exon,nonsynonymous(Manes.S065200.v7.0:Manes.S065200.1.v7.0:exon1:c.G367A:p.A123T,)	Manes.09G060700.v7.0	GO:GO:0004672; protein kinase activity; Molecular Function::GO:0004713; protein tyrosine kinase activity; Molecular Function::GO:0005524; ATP binding; Molecular Function::GO:0006468; protein phosphorylation; Biological Process||Interpro:IPR000719; Protein kinase domain::IPR001245; Serine-threonine/tyrosine-protein kinase catalytic domain::IPR002290; Serine/threonine- / dual specificity protein ki…	9741127	9754093	12967	-27067	1	9714060;-27067;C;T;0.498641304347826;6.04245573091179;exon,nonsynonymous(Manes.S065200.v7.0:Manes.S065200.1.v7.0:exon1:c.G367A:p.A123T,)
6	Chromosome09	9664060	9764060	100001	1	9714060	C	T	0.498641	6.04246	exon,nonsynonymous(Manes.S065200.v7.0:Manes.S065200.1.v7.0:exon1:c.G367A:p.A123T,)	Manes.S041000.v7.0	GO:NA||Interpro:IPR006569; CID domain||KEGG:K14400 pre-mRNA cleavage complex 2 protein Pcf11 | (RefSeq) polyadenylation and cleavage factor homolog 4 (A)||Swissprot:Polyadenylation and cleavage factor homolog 4 OS=Arabidopsis thaliana OX=3702 GN=PCFS4 PE=1 SV=1||NR:hypothetical protein MANES_S041000 [Manihot esculenta]||pfam:NA	9717330	9717956	627	-3270	1	9714060;-3270;C;T;0.498641304347826;6.04245573091179;exon,nonsynonymous(Manes.S065200.v7.0:Manes.S065200.1.v7.0:exon1:c.G367A:p.A123T,)
6	Chromosome09	9664060	9764060	100001	1	9714060	C	T	0.498641	6.04246	exon,nonsynonymous(Manes.S065200.v7.0:Manes.S065200.1.v7.0:exon1:c.G367A:p.A123T,)	Manes.S041200.v7.0	no	9724648	9724773	126	-10588	1	9714060;-10588;C;T;0.498641304347826;6.04245573091179;exon,nonsynonymous(Manes.S065200.v7.0:Manes.S065200.1.v7.0:exon1:c.G367A:p.A123T,)
6	Chromosome09	9664060	9764060	100001	1	9714060	C	T	0.498641	6.04246	exon,nonsynonymous(Manes.S065200.v7.0:Manes.S065200.1.v7.0:exon1:c.G367A:p.A123T,)	Manes.S064800.v7.0	no	9720120	9720216	97	-6060	1	9714060;-6060;C;T;0.498641304347826;6.04245573091179;exon,nonsynonymous(Manes.S065200.v7.0:Manes.S065200.1.v7.0:exon1:c.G367A:p.A123T,)
6	Chromosome09	9664060	9764060	100001	1	9714060	C	T	0.498641	6.04246	exon,nonsynonymous(Manes.S065200.v7.0:Manes.S065200.1.v7.0:exon1:c.G367A:p.A123T,)	Manes.S065000.v7.0	GO:GO:0000155; phosphorelay sensor kinase activity; Molecular Function::GO:0000156; phosphorelay response regulator activity; Molecular Function::GO:0000160; phosphorelay signal transduction system; Biological Process::GO:0005524; ATP binding; Molecular Function::GO:0006355; regulation of transcription, DNA-dependent; Biological Process::GO:0007165; signal transduction; Biological Process::GO:001…	9723381	9730181	6801	-9321	1	9714060;-9321;C;T;0.498641304347826;6.04245573091179;exon,nonsynonymous(Manes.S065200.v7.0:Manes.S065200.1.v7.0:exon1:c.G367A:p.A123T,)
6	Chromosome09	9664060	9764060	100001	1	9714060	C	T	0.498641	6.04246	exon,nonsynonymous(Manes.S065200.v7.0:Manes.S065200.1.v7.0:exon1:c.G367A:p.A123T,)	Manes.S065100.v7.0	GO:NA||Interpro:IPR006569; CID domain::IPR006903; RNA polymerase II-binding domain||KEGG:K14400 pre-mRNA cleavage complex 2 protein Pcf11 | (RefSeq) polyadenylation and cleavage factor homolog 4-like isoform X1 (A)||Swissprot:Polyadenylation and cleavage factor homolog 4 OS=Arabidopsis thaliana OX=3702 GN=PCFS4 PE=1 SV=1||NR:hypothetical protein MANES_S065100 [Manihot esculenta]||pfam:RNA polymer…	9715954	9716806	853	-1894	1	9714060;-1894;C;T;0.498641304347826;6.04245573091179;exon,nonsynonymous(Manes.S065200.v7.0:Manes.S065200.1.v7.0:exon1:c.G367A:p.A123T,)
6	Chromosome09	9664060	9764060	100001	1	9714060	C	T	0.498641	6.04246	exon,nonsynonymous(Manes.S065200.v7.0:Manes.S065200.1.v7.0:exon1:c.G367A:p.A123T,)	Manes.S065200.v7.0	GO:GO:0046872; metal ion binding; Molecular Function||Interpro:IPR007087; Zinc finger, C2H2||KEGG:K14400 pre-mRNA cleavage complex 2 protein Pcf11 | (RefSeq) polyadenylation and cleavage factor homolog 4-like (A)||Swissprot:Polyadenylation and cleavage factor homolog 4 OS=Arabidopsis thaliana OX=3702 GN=PCFS4 PE=1 SV=1||NR:hypothetical protein MANES_S065200 [Manihot esculenta]||pfam:NA	9708642	9714426	5785	0	1	9714060;0;C;T;0.498641304347826;6.04245573091179;exon,nonsynonymous(Manes.S065200.v7.0:Manes.S065200.1.v7.0:exon1:c.G367A:p.A123T,)
6	Chromosome09	9664060	9764060	100001	1	9714060	C	T	0.498641	6.04246	exon,nonsynonymous(Manes.S065200.v7.0:Manes.S065200.1.v7.0:exon1:c.G367A:p.A123T,)	Manes.S065300.v7.0	GO:GO:0000155; phosphorelay sensor kinase activity; Molecular Function::GO:0000156; phosphorelay response regulator activity; Molecular Function::GO:0000160; phosphorelay signal transduction system; Biological Process::GO:0005524; ATP binding; Molecular Function::GO:0006355; regulation of transcription, DNA-dependent; Biological Process::GO:0007165; signal transduction; Biological Process::GO:001…	9697185	9703979	6795	10081	1	9714060;10081;C;T;0.498641304347826;6.04245573091179;exon,nonsynonymous(Manes.S065200.v7.0:Manes.S065200.1.v7.0:exon1:c.G367A:p.A123T,)
7	Chromosome11	11006123	11106123	100001	1	11056123	A	G	0.060241	6.57291	intergenic(Manes.11G075400.v7.0(dist=12351),Manes.11G075500.v7.0(dist=88000))	Manes.11G075300.v7.0	GO:GO:0009058; biosynthetic process; Biological Process::GO:0016746; transferase activity, transferring acyl groups; Molecular Function||Interpro:IPR001099; Chalcone/stilbene synthase, N-terminal::IPR012328; Chalcone/stilbene synthase, C-terminal||KEGG:K00660 chalcone synthase [EC:2.3.1.74] | (RefSeq) chalcone synthase 3-like isoform X1 (A)||Swissprot:Chalcone synthase 2 OS=Ruta graveolens OX=375…	11040287	11042033	1747	14090	1	11056123;14090;A;G;0.0602409638554217;6.57291168943121;intergenic,Manes.11G075400.v7.0(dist=12351),Manes.11G075500.v7.0(dist=88000)
7	Chromosome11	11006123	11106123	100001	1	11056123	A	G	0.060241	6.57291	intergenic(Manes.11G075400.v7.0(dist=12351),Manes.11G075500.v7.0(dist=88000))	Manes.11G075400.v7.0	no	11043635	11043772	138	12351	1	11056123;12351;A;G;0.0602409638554217;6.57291168943121;intergenic,Manes.11G075400.v7.0(dist=12351),Manes.11G075500.v7.0(dist=88000)
8	Chromosome13	1467001	1567001	100001	1	1517001	T	G	0.156716	6.05924	exon,synonymous(Manes.13G014100.v7.0:Manes.13G014100.1.v7.0:exon1:c.A768C:p.A256A,)	Manes.13G013100.v7.0	GO:GO:0005515; protein binding; Molecular Function::GO:0008270; zinc ion binding; Molecular Function||Interpro:IPR001841; Zinc finger, RING-type||KEGG:K10666 E3 ubiquitin-protein ligase RNF5 [EC:2.3.2.27] | (RefSeq) RING finger protein, putative (A)||Swissprot:E3 ubiquitin-protein ligase AIRP2 OS=Arabidopsis thaliana OX=3702 GN=AIRP2 PE=1 SV=1||NR:RING-H2 finger protein ATL47-like isoform X1 [Man…	1473034	1474680	1647	42321	1	1517001;42321;T;G;0.156716417910448;6.05924412144133;exon,synonymous(Manes.13G014100.v7.0:Manes.13G014100.1.v7.0:exon1:c.A768C:p.A256A,)
8	Chromosome13	1467001	1567001	100001	1	1517001	T	G	0.156716	6.05924	exon,synonymous(Manes.13G014100.v7.0:Manes.13G014100.1.v7.0:exon1:c.A768C:p.A256A,)	Manes.13G013200.v7.0	GO:GO:0000156; phosphorelay response regulator activity; Molecular Function::GO:0000160; phosphorelay signal transduction system; Biological Process::GO:0003682; chromatin binding; Molecular Function::GO:0006355; regulation of transcription, DNA-dependent; Biological Process||Interpro:IPR001005; SANT/Myb domain::IPR001789; Signal transduction response regulator, receiver domain||KEGG:K14491 two-c…	1478286	1482302	4017	34699	1	1517001;34699;T;G;0.156716417910448;6.05924412144133;exon,synonymous(Manes.13G014100.v7.0:Manes.13G014100.1.v7.0:exon1:c.A768C:p.A256A,)
8	Chromosome13	1467001	1567001	100001	1	1517001	T	G	0.156716	6.05924	exon,synonymous(Manes.13G014100.v7.0:Manes.13G014100.1.v7.0:exon1:c.A768C:p.A256A,)	Manes.13G013300.v7.0	GO:NA||Interpro:IPR027329; TPX2, C-terminal domain||KEGG:NA||Swissprot:Protein WVD2-like 7 OS=Arabidopsis thaliana OX=3702 GN=WDL7 PE=2 SV=1||NR:protein WVD2-like 7 isoform X1 [Manihot esculenta]||pfam:Targeting protein for Xklp2 (TPX2)	1482791	1486295	3505	30706	1	1517001;30706;T;G;0.156716417910448;6.05924412144133;exon,synonymous(Manes.13G014100.v7.0:Manes.13G014100.1.v7.0:exon1:c.A768C:p.A256A,)
8	Chromosome13	1467001	1567001	100001	1	1517001	T	G	0.156716	6.05924	exon,synonymous(Manes.13G014100.v7.0:Manes.13G014100.1.v7.0:exon1:c.A768C:p.A256A,)	Manes.13G013400.v7.0	GO:NA||Interpro:IPR002068; Alpha crystallin/Hsp20 domain||KEGG:K13993 HSP20 family protein | (RefSeq) small heat shock protein, chloroplastic-like (A)||Swissprot:Small heat shock protein, chloroplastic OS=Pisum sativum OX=3888 GN=HSP21 PE=2 SV=1||NR:small heat shock protein, chloroplastic-like [Manihot esculenta]||pfam:Hsp20/alpha crystallin family	1487767	1488954	1188	28047	1	1517001;28047;T;G;0.156716417910448;6.05924412144133;exon,synonymous(Manes.13G014100.v7.0:Manes.13G014100.1.v7.0:exon1:c.A768C:p.A256A,)
8	Chromosome13	1467001	1567001	100001	1	1517001	T	G	0.156716	6.05924	exon,synonymous(Manes.13G014100.v7.0:Manes.13G014100.1.v7.0:exon1:c.A768C:p.A256A,)	Manes.13G013500.v7.0	GO:GO:0003682; chromatin binding; Molecular Function||Interpro:IPR001005; SANT/Myb domain::IPR017930; Myb domain||KEGG:K09422 transcription factor MYB, plant | (RefSeq) myb-related protein 315-like (A)||Swissprot:Myb-related protein 315 OS=Antirrhinum majus OX=4151 GN=MYB315 PE=2 SV=1||NR:myb-related protein 315-like [Manihot esculenta]||pfam:Myb-like DNA-binding domain::Myb-like DNA-binding doma…	1490104	1491277	1174	25724	1	1517001;25724;T;G;0.156716417910448;6.05924412144133;exon,synonymous(Manes.13G014100.v7.0:Manes.13G014100.1.v7.0:exon1:c.A768C:p.A256A,)
8	Chromosome13	1467001	1567001	100001	1	1517001	T	G	0.156716	6.05924	exon,synonymous(Manes.13G014100.v7.0:Manes.13G014100.1.v7.0:exon1:c.A768C:p.A256A,)	Manes.13G013600.v7.0	GO:NA||Interpro:IPR005202; Transcription factor GRAS||KEGG:K14494 DELLA protein | (Kazusa) Lj6g3v0433880.1; - (A)||Swissprot:GRAS family protein RAM1 OS=Medicago truncatula OX=3880 GN=RAM1 PE=2 SV=1||NR:hypothetical protein MANES_13G013600 [Manihot esculenta]||pfam:GRAS domain family	1501941	1503422	1482	13579	1	1517001;13579;T;G;0.156716417910448;6.05924412144133;exon,synonymous(Manes.13G014100.v7.0:Manes.13G014100.1.v7.0:exon1:c.A768C:p.A256A,)
8	Chromosome13	1467001	1567001	100001	1	1517001	T	G	0.156716	6.05924	exon,synonymous(Manes.13G014100.v7.0:Manes.13G014100.1.v7.0:exon1:c.A768C:p.A256A,)	Manes.13G013700.v7.0	GO:GO:0008152; metabolic process; Biological Process::GO:0016787; hydrolase activity; Molecular Function||Interpro:IPR013094; Alpha/beta hydrolase fold-3||KEGG:K14493 gibberellin receptor GID1 [EC:3.-.-.-] | (RefSeq) gibberellin receptor GID1C-like (A)||Swissprot:Probable carboxylesterase 16 OS=Arabidopsis thaliana OX=3702 GN=CXE16 PE=2 SV=1||NR:probable carboxylesterase 16 [Manihot esculenta]||p…	1504322	1506721	2400	10280	1	1517001;10280;T;G;0.156716417910448;6.05924412144133;exon,synonymous(Manes.13G014100.v7.0:Manes.13G014100.1.v7.0:exon1:c.A768C:p.A256A,)
8	Chromosome13	1467001	1567001	100001	1	1517001	T	G	0.156716	6.05924	exon,synonymous(Manes.13G014100.v7.0:Manes.13G014100.1.v7.0:exon1:c.A768C:p.A256A,)	Manes.13G013800.v7.0	GO:GO:0016747; transferase activity, transferring acyl groups other than amino-acyl groups; Molecular Function||Interpro:IPR003480; Transferase||KEGG:K13065 shikimate O-hydroxycinnamoyltransferase [EC:2.3.1.133] | (RefSeq) vinorine synthase-like (A)||Swissprot:Stemmadenine O-acetyltransferase OS=Catharanthus roseus OX=4058 GN=SAT PE=1 SV=1||NR:vinorine synthase [Manihot esculenta]||pfam:Transfera…	1508830	1510373	1544	6628	1	1517001;6628;T;G;0.156716417910448;6.05924412144133;exon,synonymous(Manes.13G014100.v7.0:Manes.13G014100.1.v7.0:exon1:c.A768C:p.A256A,)
8	Chromosome13	1467001	1567001	100001	1	1517001	T	G	0.156716	6.05924	exon,synonymous(Manes.13G014100.v7.0:Manes.13G014100.1.v7.0:exon1:c.A768C:p.A256A,)	Manes.13G013900.v7.0	GO:GO:0016747; transferase activity, transferring acyl groups other than amino-acyl groups; Molecular Function||Interpro:IPR003480; Transferase||KEGG:K13065 shikimate O-hydroxycinnamoyltransferase [EC:2.3.1.133] | (RefSeq) vinorine synthase-like (A)||Swissprot:Vinorine synthase OS=Rauvolfia serpentina OX=4060 GN=ACT PE=1 SV=2||NR:vinorine synthase-like [Manihot esculenta]||pfam:Transferase family	1510560	1511861	1302	5140	1	1517001;5140;T;G;0.156716417910448;6.05924412144133;exon,synonymous(Manes.13G014100.v7.0:Manes.13G014100.1.v7.0:exon1:c.A768C:p.A256A,)
8	Chromosome13	1467001	1567001	100001	1	1517001	T	G	0.156716	6.05924	exon,synonymous(Manes.13G014100.v7.0:Manes.13G014100.1.v7.0:exon1:c.A768C:p.A256A,)	Manes.13G014000.v7.0	GO:GO:0016747; transferase activity, transferring acyl groups other than amino-acyl groups; Molecular Function||Interpro:IPR003480; Transferase||KEGG:K13065 shikimate O-hydroxycinnamoyltransferase [EC:2.3.1.133] | (RefSeq) vinorine synthase-like (A)||Swissprot:BAHD acyltransferase At5g47980 OS=Arabidopsis thaliana OX=3702 GN=BAHD1 PE=2 SV=1||NR:hypothetical protein MANES_13G014000 [Manihot escule…	1513676	1515088	1413	1913	1	1517001;1913;T;G;0.156716417910448;6.05924412144133;exon,synonymous(Manes.13G014100.v7.0:Manes.13G014100.1.v7.0:exon1:c.A768C:p.A256A,)
8	Chromosome13	1467001	1567001	100001	1	1517001	T	G	0.156716	6.05924	exon,synonymous(Manes.13G014100.v7.0:Manes.13G014100.1.v7.0:exon1:c.A768C:p.A256A,)	Manes.13G014100.v7.0	GO:GO:0016747; transferase activity, transferring acyl groups other than amino-acyl groups; Molecular Function||Interpro:IPR003480; Transferase||KEGG:K13065 shikimate O-hydroxycinnamoyltransferase [EC:2.3.1.133] | (RefSeq) acylsugar acyltransferase 3-like (A)||Swissprot:Acylsugar acyltransferase 3 OS=Solanum lycopersicum OX=4081 GN=ASAT3 PE=2 SV=1||NR:acylsugar acyltransferase 3-like [Manihot esc…	1516440	1517768	1329	0	1	1517001;0;T;G;0.156716417910448;6.05924412144133;exon,synonymous(Manes.13G014100.v7.0:Manes.13G014100.1.v7.0:exon1:c.A768C:p.A256A,)
8	Chromosome13	1467001	1567001	100001	1	1517001	T	G	0.156716	6.05924	exon,synonymous(Manes.13G014100.v7.0:Manes.13G014100.1.v7.0:exon1:c.A768C:p.A256A,)	Manes.13G014200.v7.0	GO:GO:0000159; protein phosphatase type 2A complex; Cellular Component::GO:0007165; signal transduction; Biological Process::GO:0008601; protein phosphatase type 2A regulator activity; Molecular Function||Interpro:IPR002554; Protein phosphatase 2A, regulatory B subunit, B56||KEGG:K11584 serine/threonine-protein phosphatase 2A regulatory subunit B' | (RefSeq) serine/threonine protein phosphatase 2…	1520216	1524130	3915	-3215	1	1517001;-3215;T;G;0.156716417910448;6.05924412144133;exon,synonymous(Manes.13G014100.v7.0:Manes.13G014100.1.v7.0:exon1:c.A768C:p.A256A,)
8	Chromosome13	1467001	1567001	100001	1	1517001	T	G	0.156716	6.05924	exon,synonymous(Manes.13G014100.v7.0:Manes.13G014100.1.v7.0:exon1:c.A768C:p.A256A,)	Manes.13G014300.v7.0	GO:GO:0006614; SRP-dependent cotranslational protein targeting to membrane; Biological Process::GO:0008312; 7S RNA binding; Molecular Function::GO:0048500; signal recognition particle; Cellular Component||Interpro:IPR013699; Signal recognition particle, SRP72 subunit, RNA-binding::IPR026270; Signal recognition particle, SRP72 subunit||KEGG:K03108 signal recognition particle subunit SRP72 | (RefSe…	1525890	1529084	3195	-8889	1	1517001;-8889;T;G;0.156716417910448;6.05924412144133;exon,synonymous(Manes.13G014100.v7.0:Manes.13G014100.1.v7.0:exon1:c.A768C:p.A256A,)
8	Chromosome13	1467001	1567001	100001	1	1517001	T	G	0.156716	6.05924	exon,synonymous(Manes.13G014100.v7.0:Manes.13G014100.1.v7.0:exon1:c.A768C:p.A256A,)	Manes.13G014400.v7.0	GO:NA||Interpro:NA||KEGG:NA||Swissprot:F-box protein SKIP14 OS=Arabidopsis thaliana OX=3702 GN=SKIP14 PE=1 SV=1||NR:F-box protein SKIP14-like [Manihot esculenta]||pfam:NA	1531769	1533922	2154	-14768	1	1517001;-14768;T;G;0.156716417910448;6.05924412144133;exon,synonymous(Manes.13G014100.v7.0:Manes.13G014100.1.v7.0:exon1:c.A768C:p.A256A,)
8	Chromosome13	1467001	1567001	100001	1	1517001	T	G	0.156716	6.05924	exon,synonymous(Manes.13G014100.v7.0:Manes.13G014100.1.v7.0:exon1:c.A768C:p.A256A,)	Manes.13G014500.v7.0	GO:NA||Interpro:NA||KEGG:NA||Swissprot:NA||NR:hypothetical protein MANES_13G014500 [Manihot esculenta]||pfam:NA	1535194	1535807	614	-18193	1	1517001;-18193;T;G;0.156716417910448;6.05924412144133;exon,synonymous(Manes.13G014100.v7.0:Manes.13G014100.1.v7.0:exon1:c.A768C:p.A256A,)
8	Chromosome13	1467001	1567001	100001	1	1517001	T	G	0.156716	6.05924	exon,synonymous(Manes.13G014100.v7.0:Manes.13G014100.1.v7.0:exon1:c.A768C:p.A256A,)	Manes.13G014600.v7.0	GO:NA||Interpro:NA||KEGG:NA||Swissprot:NA||NR:hypothetical protein MANES_13G014600 [Manihot esculenta]||pfam:NA	1538423	1538599	177	-21422	1	1517001;-21422;T;G;0.156716417910448;6.05924412144133;exon,synonymous(Manes.13G014100.v7.0:Manes.13G014100.1.v7.0:exon1:c.A768C:p.A256A,)
8	Chromosome13	1467001	1567001	100001	1	1517001	T	G	0.156716	6.05924	exon,synonymous(Manes.13G014100.v7.0:Manes.13G014100.1.v7.0:exon1:c.A768C:p.A256A,)	Manes.13G014700.v7.0	GO:NA||Interpro:IPR019080; YqaJ viral recombinase||KEGG:K18173 cytochrome c oxidase assembly factor 1 | (RefSeq) uncharacterized protein LOC109810688 (A)||Swissprot:NA||NR:uncharacterized protein LOC110630315 [Manihot esculenta]||pfam:YqaJ-like viral recombinase domain	1538814	1541068	2255	-21813	1	1517001;-21813;T;G;0.156716417910448;6.05924412144133;exon,synonymous(Manes.13G014100.v7.0:Manes.13G014100.1.v7.0:exon1:c.A768C:p.A256A,)
8	Chromosome13	1467001	1567001	100001	1	1517001	T	G	0.156716	6.05924	exon,synonymous(Manes.13G014100.v7.0:Manes.13G014100.1.v7.0:exon1:c.A768C:p.A256A,)	Manes.13G014800.v7.0	GO:GO:0003682; chromatin binding; Molecular Function||Interpro:IPR001005; SANT/Myb domain::IPR017877; Myb-like domain||KEGG:K01587 phosphoribosylaminoimidazole carboxylase / phosphoribosylaminoimidazole-succinocarboxamide synthase [EC:4.1.1.21 6.3.2.6] | (RefSeq) PAICS; multifunctional protein ADE2 isoform X1 (A)||Swissprot:Trihelix transcription factor GT-1 OS=Arabidopsis thaliana OX=3702 GN=GT-…	1541498	1547503	6006	-24497	1	1517001;-24497;T;G;0.156716417910448;6.05924412144133;exon,synonymous(Manes.13G014100.v7.0:Manes.13G014100.1.v7.0:exon1:c.A768C:p.A256A,)
8	Chromosome13	1467001	1567001	100001	1	1517001	T	G	0.156716	6.05924	exon,synonymous(Manes.13G014100.v7.0:Manes.13G014100.1.v7.0:exon1:c.A768C:p.A256A,)	Manes.13G014900.v7.0	GO:GO:0007094; mitotic spindle assembly checkpoint; Biological Process||Interpro:IPR003511; DNA-binding HORMA::IPR027097; Mitotic spindle checkpoint protein Mad2||KEGG:K02537 mitotic spindle assembly checkpoint protein MAD2 | (RefSeq) mitotic spindle checkpoint protein MAD2 (A)||Swissprot:Mitotic spindle checkpoint protein MAD2 OS=Arabidopsis thaliana OX=3702 GN=MAD2 PE=1 SV=1||NR:hypothetical pr…	1547593	1549149	1557	-30592	1	1517001;-30592;T;G;0.156716417910448;6.05924412144133;exon,synonymous(Manes.13G014100.v7.0:Manes.13G014100.1.v7.0:exon1:c.A768C:p.A256A,)
8	Chromosome13	1467001	1567001	100001	1	1517001	T	G	0.156716	6.05924	exon,synonymous(Manes.13G014100.v7.0:Manes.13G014100.1.v7.0:exon1:c.A768C:p.A256A,)	Manes.13G015000.v7.0	GO:GO:0000166; nucleotide binding; Molecular Function::GO:0005524; ATP binding; Molecular Function::GO:0006810; transport; Biological Process::GO:0016021; integral to membrane; Cellular Component::GO:0016887; ATPase activity; Molecular Function::GO:0017111; nucleoside-triphosphatase activity; Molecular Function::GO:0042626; ATPase activity, coupled to transmembrane movement of substances; Molecul…	1555722	1561734	6013	-38721	1	1517001;-38721;T;G;0.156716417910448;6.05924412144133;exon,synonymous(Manes.13G014100.v7.0:Manes.13G014100.1.v7.0:exon1:c.A768C:p.A256A,)
8	Chromosome13	1467001	1567001	100001	1	1517001	T	G	0.156716	6.05924	exon,synonymous(Manes.13G014100.v7.0:Manes.13G014100.1.v7.0:exon1:c.A768C:p.A256A,)	Manes.13G015100.v7.0	GO:NA||Interpro:IPR010530; NADH-ubiquinone reductase complex 1 MLRQ subunit||KEGG:NA||Swissprot:NA||NR:uncharacterized protein LOC110630185 [Manihot esculenta]||pfam:NADH-ubiquinone reductase complex 1 MLRQ subunit	1562115	1562867	753	-45114	1	1517001;-45114;T;G;0.156716417910448;6.05924412144133;exon,synonymous(Manes.13G014100.v7.0:Manes.13G014100.1.v7.0:exon1:c.A768C:p.A256A,)
8	Chromosome13	1467001	1567001	100001	1	1517001	T	G	0.156716	6.05924	exon,synonymous(Manes.13G014100.v7.0:Manes.13G014100.1.v7.0:exon1:c.A768C:p.A256A,)	Manes.13G015200.v7.0	GO:GO:0016620; oxidoreductase activity, acting on the aldehyde or oxo group of donors, NAD or NADP as acceptor; Molecular Function::GO:0055114; oxidation-reduction process; Biological Process||Interpro:IPR020828; Glyceraldehyde 3-phosphate dehydrogenase, NAD(P) binding domain::IPR020829; Glyceraldehyde 3-phosphate dehydrogenase, catalytic domain::IPR020831; Glyceraldehyde/Erythrose phosphate dehy…	1564263	1566933	2671	-47262	1	1517001;-47262;T;G;0.156716417910448;6.05924412144133;exon,synonymous(Manes.13G014100.v7.0:Manes.13G014100.1.v7.0:exon1:c.A768C:p.A256A,)
9	Chromosome13	25640761	25740761	100001	1	25690761	G	T	0.0732044	6.32964	intergenic(Manes.13G100300.v7.0(dist=23141),Manes.13G100000.v7.0(dist=48315))	Manes.13G100000.v7.0	GO:NA||Interpro:NA||KEGG:K20283 golgin subfamily A member 4 | (RefSeq) uncharacterized protein At4g38062-like (A)||Swissprot:Uncharacterized protein At4g38062 OS=Arabidopsis thaliana OX=3702 GN=At4g38062 PE=4 SV=1||NR:uncharacterized protein At4g38062 [Manihot esculenta]||pfam:NA	25739076	25743914	4839	-48315	1	25690761;-48315;G;T;0.0732044198895028;6.32963937100956;intergenic,Manes.13G100300.v7.0(dist=23141),Manes.13G100000.v7.0(dist=48315)
9	Chromosome13	25640761	25740761	100001	1	25690761	G	T	0.0732044	6.32964	intergenic(Manes.13G100300.v7.0(dist=23141),Manes.13G100000.v7.0(dist=48315))	Manes.13G100100.v7.0	GO:GO:0003824; catalytic activity; Molecular Function::GO:0008152; metabolic process; Biological Process||Interpro:IPR000868; Isochorismatase-like||KEGG:K08281 nicotinamidase/pyrazinamidase [EC:3.5.1.19 3.5.1.-] | (GenBank) cysteine hydrolase (A)||Swissprot:Nicotinamidase 1 OS=Arabidopsis thaliana OX=3702 GN=NIC1 PE=1 SV=1||NR:nicotinamidase 1-like [Manihot esculenta]||pfam:Isochorismatase family	25641083	25643281	2199	47480	1	25690761;47480;G;T;0.0732044198895028;6.32963937100956;intergenic,Manes.13G100300.v7.0(dist=23141),Manes.13G100000.v7.0(dist=48315)
9	Chromosome13	25640761	25740761	100001	1	25690761	G	T	0.0732044	6.32964	intergenic(Manes.13G100300.v7.0(dist=23141),Manes.13G100000.v7.0(dist=48315))	Manes.13G100200.v7.0	GO:NA||Interpro:IPR011684; KIP1-like||KEGG:K20478 golgin subfamily B member 1 | (RefSeq) uncharacterized LOC107783593 (A)||Swissprot:Protein NETWORKED 2D OS=Arabidopsis thaliana OX=3702 GN=NET2D PE=3 SV=1||NR:hypothetical protein MANES_13G100200 [Manihot esculenta]||pfam:KIP1-like protein	25643567	25649106	5540	41655	1	25690761;41655;G;T;0.0732044198895028;6.32963937100956;intergenic,Manes.13G100300.v7.0(dist=23141),Manes.13G100000.v7.0(dist=48315)
9	Chromosome13	25640761	25740761	100001	1	25690761	G	T	0.0732044	6.32964	intergenic(Manes.13G100300.v7.0(dist=23141),Manes.13G100000.v7.0(dist=48315))	Manes.13G100300.v7.0	GO:NA||Interpro:NA||KEGG:NA||Swissprot:NA||NR:uncharacterized protein LOC110630138 [Manihot esculenta]||pfam:NA	25665430	25667620	2191	23141	1	25690761;23141;G;T;0.0732044198895028;6.32963937100956;intergenic,Manes.13G100300.v7.0(dist=23141),Manes.13G100000.v7.0(dist=48315)
10	Chromosome13	27108822	27208822	100001	1	27158822	T	A	0.480874	7.21221	upstream(Manes.13G105700.v7.0)	Manes.13G105400.v7.0	GO:GO:0016021; integral to membrane; Cellular Component::GO:0055085; transmembrane transport; Biological Process||Interpro:IPR011701; Major facilitator superfamily::IPR020846; Major facilitator superfamily domain||KEGG:K09008 NADH dehydrogenase [ubiquinone] 1 alpha subcomplex assembly factor 3 | (RefSeq) sugar transporter (A)||Swissprot:Probable sphingolipid transporter spinster homolog 2 OS=Arab…	27102389	27116223	13835	42599	1	27158822;42599;T;A;0.480874316939891;7.21220943129022;upstream,Manes.13G105700.v7.0
10	Chromosome13	27108822	27208822	100001	1	27158822	T	A	0.480874	7.21221	upstream(Manes.13G105700.v7.0)	Manes.13G105500.v7.0	GO:GO:0003777; microtubule motor activity; Molecular Function::GO:0005524; ATP binding; Molecular Function::GO:0005871; kinesin complex; Cellular Component::GO:0007018; microtubule-based movement; Biological Process::GO:0008017; microtubule binding; Molecular Function||Interpro:IPR001752; Kinesin, motor domain::IPR027640; Kinesin-like protein||KEGG:K10401 kinesin family member 18/19 | (RefSeq) ki…	27122022	27129730	7709	29092	1	27158822;29092;T;A;0.480874316939891;7.21220943129022;upstream,Manes.13G105700.v7.0
10	Chromosome13	27108822	27208822	100001	1	27158822	T	A	0.480874	7.21221	upstream(Manes.13G105700.v7.0)	Manes.13G105600.v7.0	GO:NA||Interpro:NA||KEGG:NA||Swissprot:NA||NR:hypothetical protein MANES_13G105600 [Manihot esculenta]||pfam:NA	27134862	27136449	1588	22373	1	27158822;22373;T;A;0.480874316939891;7.21220943129022;upstream,Manes.13G105700.v7.0
10	Chromosome13	27108822	27208822	100001	1	27158822	T	A	0.480874	7.21221	upstream(Manes.13G105700.v7.0)	Manes.13G105700.v7.0	GO:GO:0046983; protein dimerization activity; Molecular Function||Interpro:IPR011598; Myc-type, basic helix-loop-helix (bHLH) domain||KEGG:K14963 COMPASS component SWD3 | (RefSeq) transcription factor bHLH18-like (A)||Swissprot:Transcription factor bHLH25 OS=Arabidopsis thaliana OX=3702 GN=BHLH25 PE=2 SV=2||NR:transcription factor bHLH18-like [Manihot esculenta]||pfam:Helix-loop-helix DNA-binding…	27159109	27160508	1400	-287	1	27158822;-287;T;A;0.480874316939891;7.21220943129022;upstream,Manes.13G105700.v7.0
11	Chromosome16	8854848	8954848	100001	1	8904848	G	A	0.296399	6.18116	intergenic(Manes.16G048100.v7.0(dist=10062),Manes.16G046300.v7.0(dist=38920))	Manes.16G046300.v7.0	GO:NA||Interpro:IPR006873; Protein of unknown function DUF620||KEGG:K11426 SET and MYND domain-containing protein | (RefSeq) hypothetical protein (A)||Swissprot:NA||NR:uncharacterized protein LOC110603408 [Manihot esculenta]||pfam:Protein of unknown function (DUF620)	8943768	8946102	2335	-38920	1	8904848;-38920;G;A;0.296398891966759;6.18116177383434;intergenic,Manes.16G048100.v7.0(dist=10062),Manes.16G046300.v7.0(dist=38920)
11	Chromosome16	8854848	8954848	100001	1	8904848	G	A	0.296399	6.18116	intergenic(Manes.16G048100.v7.0(dist=10062),Manes.16G046300.v7.0(dist=38920))	Manes.16G048100.v7.0	GO:GO:0008152; metabolic process; Biological Process::GO:0016491; oxidoreductase activity; Molecular Function::GO:0055114; oxidation-reduction process; Biological Process||Interpro:IPR015590; Aldehyde dehydrogenase domain||KEGG:K17761 succinate-semialdehyde dehydrogenase, mitochondrial [EC:1.2.1.24] | (RefSeq) succinate-semialdehyde dehydrogenase, mitochondrial (A)||Swissprot:Succinate-semialdehy…	8879868	8894786	14919	10062	1	8904848;10062;G;A;0.296398891966759;6.18116177383434;intergenic,Manes.16G048100.v7.0(dist=10062),Manes.16G046300.v7.0(dist=38920)
12	Chromosome16	14676028	14776028	100001	1	14726028	C	T	0.0555556	6.71809	intergenic(Manes.16G053700.v7.0(dist=6007),Manes.16G053800.v7.0(dist=14032))	Manes.16G053700.v7.0	GO:NA||Interpro:IPR017877; Myb-like domain||KEGG:K06210 nicotinamide mononucleotide adenylyltransferase [EC:2.7.7.1 2.7.7.18] | (RefSeq) uncharacterized protein LOC112287926 isoform X1 (A)||Swissprot:Trihelix transcription factor ASR3 OS=Arabidopsis thaliana OX=3702 GN=ASR3 PE=1 SV=1||NR:uncharacterized protein LOC110604244 isoform X1 [Manihot esculenta]||pfam:Myb/SANT-like DNA-binding domain	14718788	14720021	1234	6007	1	14726028;6007;C;T;0.0555555555555556;6.71809210351063;intergenic,Manes.16G053700.v7.0(dist=6007),Manes.16G053800.v7.0(dist=14032)
12	Chromosome16	14676028	14776028	100001	1	14726028	C	T	0.0555556	6.71809	intergenic(Manes.16G053700.v7.0(dist=6007),Manes.16G053800.v7.0(dist=14032))	Manes.16G053800.v7.0	GO:NA||Interpro:IPR008803; RHD3/Sey1||KEGG:K22698 protein SEY1 [EC:3.6.5.-] | (RefSeq) protein ROOT HAIR DEFECTIVE 3 homolog 2 isoform X1 (A)||Swissprot:Protein ROOT HAIR DEFECTIVE 3 homolog 2 OS=Arabidopsis thaliana OX=3702 GN=At5g45160 PE=2 SV=1||NR:hypothetical protein MANES_16G053800 [Manihot esculenta]||pfam:Root hair defective 3 GTP-binding protein (RHD3)	14740060	14763307	23248	-14032	1	14726028;-14032;C;T;0.0555555555555556;6.71809210351063;intergenic,Manes.16G053700.v7.0(dist=6007),Manes.16G053800.v7.0(dist=14032)
13	Chromosome18	31036854	31136854	100001	1	31086854	T	G	0.5	6.07538	intergenic(Manes.18G145000.v7.0(dist=337968),Manes.S029100.v7.0(dist=154799))
